# Supplementary material
Source: ML conference proceedings conference paper supplement (https://openaccess.thecvf.com/content/CVPR2023/html/Wang_PyPose_A_Library_CVPR_2023_paper.html)
Supplement: Supplementary file 1 [file Wang_PyPose_A_Library_CVPR_2023_supplemental.pdf]

# PyPose: A Library for Robot Learning with Physics-based Optimization

## Supplementary Material

Chen Wang<sup>1,2,✉</sup>, Dasong Gao<sup>1,3</sup>, Kuan Xu<sup>4</sup>, Junyi Geng<sup>1</sup>, Yaoyu Hu<sup>1</sup>, Yuheng Qiu<sup>1</sup>, Bowen Li<sup>1</sup>, Fan Yang<sup>5</sup>, Brady Moon<sup>1</sup>, Abhinav Pandey<sup>6</sup>, Aryan<sup>1,7</sup>, Jiahe Xu<sup>1</sup>, Tianhao Wu<sup>8</sup>, Haonan He<sup>1</sup>, Daning Huang<sup>6</sup>, Zhongqiang Ren<sup>1</sup>, Shibo Zhao<sup>1</sup>, Taimeng Fu<sup>9</sup>, Pranay Reddy<sup>10</sup>, Xiao Lin<sup>11</sup>, Wenshan Wang<sup>1</sup>, Jingnan Shi<sup>3</sup>, Rajat Talak<sup>3</sup>, Kun Cao<sup>4</sup>, Yi Du<sup>2</sup>, Han Wang<sup>4</sup>, Huai Yu<sup>12</sup>, Shanzhao Wang<sup>13</sup>, Siyu Chen<sup>4</sup>, Ananth Kashyap<sup>14</sup>, Rohan Bandaru<sup>15</sup>, Karthik Dantu<sup>2</sup>, Jiajun Wu<sup>16</sup>, Lihua Xie<sup>4</sup>, Luca Carlone<sup>3</sup>, Marco Hutter<sup>5</sup>, Sebastian Scherer<sup>1</sup>

<https://pypose.org>

### A. Sample Code of LieTensor

The following code sample shows how to rotate random points and compute the gradient of batched rotation.

```
>>> import torch, pypose as pp

>>> # A random so(3) LieTensor
>>> r = pp.randn_so3(2, requires_grad=True)
so3Type LieTensor:
tensor([[ 0.1606,  0.0232, -1.5516],
        [-0.0807, -0.7184, -0.1102]],
        requires_grad=True)

>>> R = r.Exp() # Equivalent to: R = pp.Exp(r)
SO3Type LieTensor:
tensor([[ 0.0724,  0.0104, -0.6995,  0.7109],
        [-0.0395, -0.3513, -0.0539,  0.9339]],
        grad_fn=<AliasBackward0>)

>>> p = R @ torch.randn(3) # Rotate random point
tensor([[ 0.8045, -0.8555,  0.5260],
        [ 0.3502,  0.8337,  0.9154]],
        grad_fn=<ViewBackward0>)

>>> p.sum().backward() # Compute gradient
>>> r.grad # Print gradient
tensor([[ -0.7920, -0.9510,  1.7110],
        [-0.2659,  0.5709, -0.3855]])
```

✉Corresponding Author. chenwang@dr.com

<sup>1</sup>Carnegie Mellon University, Pittsburgh, PA 15213, USA.

<sup>2</sup>State University of New York at Buffalo, NY 14260, USA.

<sup>3</sup>Massachusetts Institute of Technology, Cambridge, MA 02139, USA.

<sup>4</sup>Nanyang Technological University, Singapore 639798.

<sup>5</sup>ETH Zürich, 8092 Zürich, Switzerland.

<sup>6</sup>Pennsylvania State University, University Park, PA 16801, USA.

<sup>7</sup>Delhi Technological University, Delhi, India.

<sup>8</sup>University of Virginia, Charlottesville, VA 22904, USA.

<sup>9</sup>The Chinese University of Hong Kong, Shenzhen, China.

<sup>10</sup>University of Massachusetts Amherst, MA 01003, USA.

<sup>11</sup>Georgia Institute of Technology, Atlanta, GA 30332, USA

<sup>12</sup>Wuhan University, Hubei 430072, China.

<sup>13</sup>University of Michigan, Ann Arbor, MI 48109, USA.

<sup>14</sup>Fox Chapel Area High School, Pittsburgh, PA 15238, USA.

<sup>15</sup>Lexington High School, Lexington, MA 02421, USA.

<sup>16</sup>Stanford University, Stanford, CA 94305, USA.

### B. Sample Code of Optimizer

We show how to estimate batched transform inverse by a 2<sup>nd</sup>-order optimizer. Two usage options for a scheduler are provided, each of which can work independently.

```
>>> from torch import nn
>>> import torch, pypose as pp
>>> from pypose.optim import LM
>>> from pypose.optim.strategy import Constant
>>> from pypose.optim.scheduler \
>>> import StopOnPlateau

>>> class InvNet(nn.Module):

>>>     def __init__(self, *dim):
>>>         super().__init__()
>>>         init = pp.randn_SE3(*dim)
>>>         self.pose = pp.Parameter(init)

>>>     def forward(self, input):
>>>         error = (self.pose @ input).Log()
>>>         return error.tensor()

>>> device = torch.device("cuda")
>>> input = pp.randn_SE3(2, 2, device=device)
>>> invnet = InvNet(2, 2).to(device)
>>> strategy = Constant(damping=1e-4)
>>> optimizer = LM(invnet, strategy=strategy)
>>> scheduler = StopOnPlateau(optimizer,
>>>                             steps=10,
>>>                             patience=3,
>>>                             decreasing=1e-3,
>>>                             verbose=True)

>>> # 1st option, full optimization
>>> scheduler.optimize(input=input)

>>> # 2nd option, step optimization
>>> while scheduler.continual():
>>>     loss = optimizer.step(input)
>>>     scheduler.step(loss)
```
